# Supplementary material for: Overexpression of the mitochondrial Mg channel MRS2 increases total cellular Mg concentration and influences sensitivity to apoptosis
Source: Royal Society of Chemistry journal article supplement (doi:10.1039/c8mt00050f), 2018-01-01
Supplement: c8mt00050f1.pdf [file c8mt00050f1.pdf]

## 1 Electronic Supplementary Information

2

### 3 Cellular Toxicity

4 The extent of cellular toxicity caused by transfection is influenced by the reagent and the nature of the cells. In particular, for cell  
5 types, dramatic toxicity can be directly visualized by using microscopy. Cytotoxicity of pcDNA6/TR is reported in Figure 1 of the  
6 main text. We also evaluated cytotoxicity by light microscopy of transfected cells, both uninduced and induced. Transient  
7 transfection with pcDNA5/TO-MRS2 with PEI as the transfection reagent did not alter the proliferation and morphological features  
8 of Clone-2 cells, both induced and uninduced. HEK-293 cells are reported as an additional control.

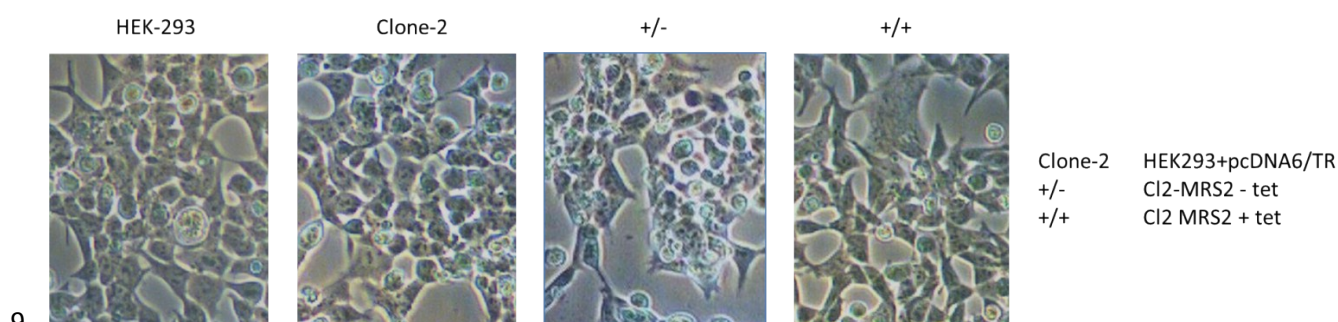

10 **Fig. 10 ESI** Cell morphology of HEK293, Clone-2, Clone-2 transfected with pcDNA5/TO-MRS2, un-induced, and induced. Treatment  
11 does not induce any cytotoxicity.

12

### 13 Real time-qPCR

14 Cells were seeded at a density of  $2.5 \times 10^6$  cells per T75 flask and grown overnight. PEI-mediated transfection with either  
15 pcDNA5/TO-MRS2, pcDNA5/TO-SLC41A3, or the empty vector control was carried out as described. Twenty-four hours after  
16 transfection, protein expression was induced by the addition of tetracycline, whereas uninduced control cells were left untreated.  
17 After a further 24 hours, cells were collected, washed two times with ice-cold PBS, and immediately frozen in liquid nitrogen. Total  
18 RNA was isolated with the Nucleospin RNA II Kit (Macherey-Nagel GmbH & Co. KG, Düren, Germany). The RNA concentration was  
19 quantified by NanoDrop (PEQLAB Biotechnologie GmbH, Erlangen, Germany), and RNA integrity (RIN) was determined with a 2100  
20 Bioanalyzer (Agilent Technologies, Böblingen, Germany). All samples had a RIN value of 9 or higher. cDNA was synthesized with the  
21 iScript™ cDNA Synthesis Kit (Bio-Rad Laboratories GmbH, Munich, Germany) by reverse-transcribing 1000 ng total RNA in a volume  
22 of 20  $\mu$ l (in an Eppendorf Mastercycler nexus gradient; Hamburg, Germany). The cDNAs were then diluted 1:5. The primer pairs  
23 used for RT-qPCR were first tested in conventional PCRs for their specificity, and the PCR products were analyzed by bidirectional  
24 sequencing.

25 Used primers:

26 **MRS2** (*MRS2*Fwd: 5'-CCACCGAAACGTGATGATGAG-3'; *MRS2*Rev: CATTCCAAAAGCAACTCCC-3'; amplicon size 94 bp)

27 **SLC41A3** (*SLC41A3*Fwd: 5'-CTTCTGGACTATTTCAGCAC-3'; *SLC41A3*Rev: 5'-TCATCTCCAGGTTCCCTTC-3'; amplicon size 100 bp)

28

29 The reference genes *B2M* (NM\_004048, Beta-2-microglobulin) and *YWHAZ* (NM\_001135699.1, Tyrosine 3-monooxygenase/  
30 tryptophan 5-monooxygenase activation protein, zeta polypeptide) and *Tuba1b* (NM\_006082.2, Tubulin, alpha 1b) were used in the  
31 qPCRs.

32

33 **B2M** (*B2M*Fwd: 5'-TGCTGTCTCCATGTTTGATGTATCT-3'; *B2M*Rev: 5'-CTCTGCTCCCCACCTCTAAGT-3'; amplicon size 86 bp)

34 **YWHAZ** (*YWHAZ*Fwd: 5'-ACTTTTGGTACATTGTGGCTTCAA-3'; *YWHAZ*Rev: 5'-CCGCCAGGACAAACCAGTAT-3'; amplicon size: 94)

35 **Tuba1b** (*Tuba1b*Fwd: 5'-GCCCTACAACCTCCATCCTCA-3'; *Tuba1b*Rev: 5'-GTCAACATTCAGGGCTCCAT-3'; amplicon size: 205)

36 For qPCR experiments, a 40-cycle three-step PCR protocol (30 s at 95 °C, 30 s at 58 °C, and 30 s 72 °C) was performed on a  
37 thermocycler (ViiA7, Applied Biosystems/Life Technologies) with SYBR green detection and three replicates per reaction. The final  
38 volume was 10 µl containing 5 µl cDNA, primers (0.5 µl of 20 pmol/µl each), and iQ SYBR Green Supermix (Bio-Rad Laboratories  
39 GmbH, München, Germany). Thresholds were automatically calculated by the cycler software. For data analysis, the software  
40 qbasePLUS (Biogazelle NV, Zwijnaarde, Belgium) was used to perform inter-run calibration and to test for the expression stability of  
41 the reference genes. Normalization was performed with *B2M* and *YWHAZ*, since *Tub1b* did not exhibit sufficient stability. After the  
42 normalization of Cq values with the respective reference genes, results were exported as calibrated normalized relative quantity  
43 (CNRQ) values. Relative expression values were used for statistical analysis.

44

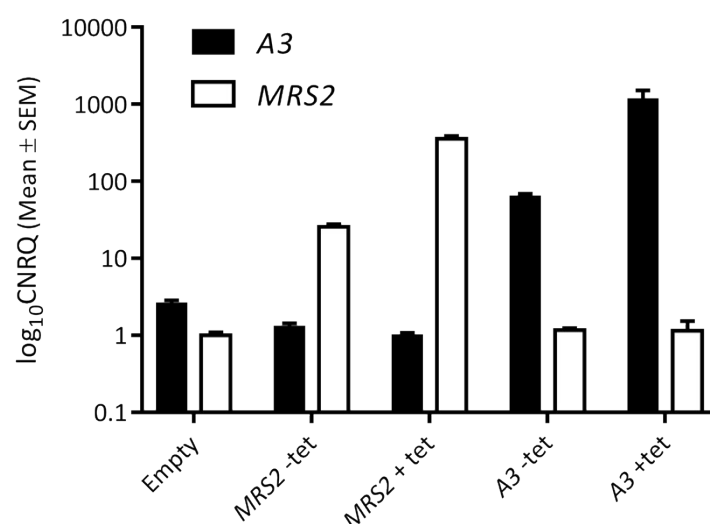

45

46 **Fig. 11** ESI qPCR analysis of *SLC41A3* (A3) and *MRS2* expression. Averaged normalized logarithmic relative expression values of A3  
47 and *MRS2* in arbitrary units (CNRQ ± SEM) determined by qPCR analysis of Clone-2 cells, induced (+tet) and uninduced (-tet). Clone-  
48 2 cells transfected with empty vector were used as controls.

49

50 **DCHQ5 Chemical Structure**

51

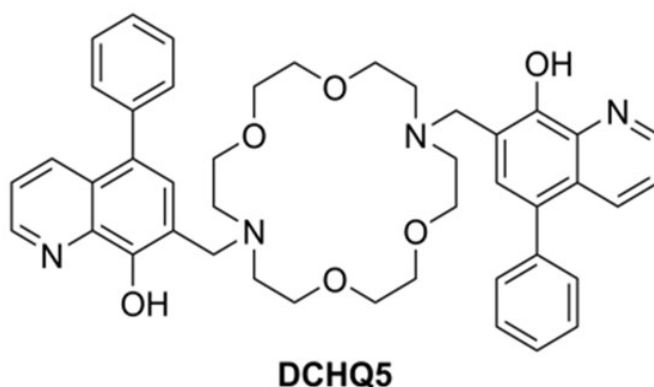

52  
53  
54 **Fig. 12 ESI DCHQ5 structure.** Chemical structure of the fluorescent chemosensor Diaza-crown-8 hydroxyquinoline derivative.  
55  
56  
57 **Single Cell Analysis**

## CI2-MRS2

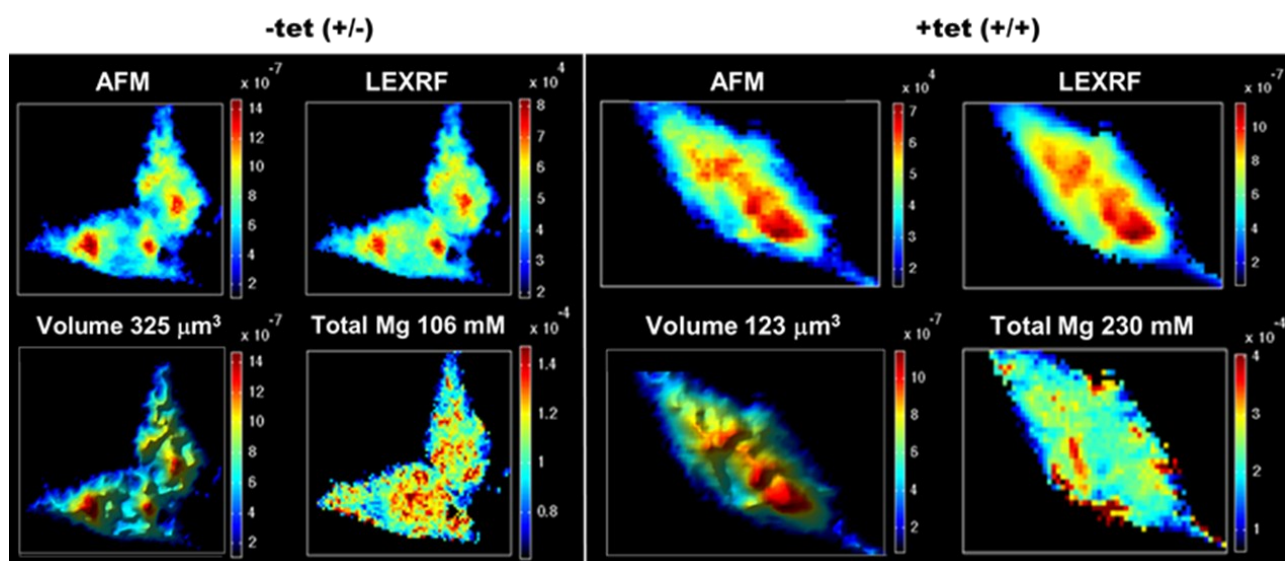

58  
59 **Fig. 13 ESI.** Single cell analyses of two chosen uninduced and induced CI2-MRS2 cells are reported for completeness. The maps  
60 confirm the higher distribution of Mg in the nuclear region with spots in the peripheral area in both induced and un-induced cells.  
61 Single cell analysis performed on chemically fixed CI2-MRS2 cells, both uninduced (-tet +/-) and induced (+tet +/+) with tetracycline  
62 at 1μg/mL. The upper panels show the AFM (right) and LEXRF (left) maps. The bottom panel depicts a 3D rendering of the AFM  
63 (left) and the Mg intracellular concentration (right) maps, mathematically estimated from the combination of AFM and LEXRF  
64 analyses and highlighting the cell thickness and the overall distribution of the intracellular Mg, respectively. The total Mg  
65 concentration represents the concentration value of the entire single cell. Single cell analyses were carried out on six uninduced (-  
66 tet +/-) and seven induced (+tet +/+) CI2-MRS2 cells. Scale bar is 2 μm.

67  
68 **Cell volume assessment**

69 To determine the hydrated cell volume for cell population analysis, Clone-2-MRS2 cells were trypsinized and resuspended in PBS.  
70 Cells volumes were calculated by counting CI2-MRS2 cells on a double-threshold Z1 Coulter Counter (Beckman Coulter, CA, USA),  
71 and the thresholds were set to cover the interval from 65 to 3,600 fL, each step corresponding to an increase of 2  $\mu\text{m}$  in cell  
72 diameter. The mean cellular volume was estimated from the Gaussian distribution of the data. The analysis were carried out in  
73 triplicate. The cellular volume is given in terms of equivalent spherical diameter.  
74 The volume of dehydrated Clone-2-MRS2 cells (for single cell analyses) was calculated on chemically fixed cells by using the AFM  
75 imaging technique. Measurements were carried out in air in tapping mode by using an XE-100 instrument (Park Instruments)  
76 operating in soft-contact mode (force setpoint= 0.1-1nN) by silicon cantilevers (CSC38 Mikromasch, spring constant= 0.03 N/m).  
77 The typical square scan size used was in the order of 40  $\mu\text{m}$   $\times$  40  $\mu\text{m}$ , and the matrix resolution in pixels were 256x256 or 512  $\times$   
78 512.  
79

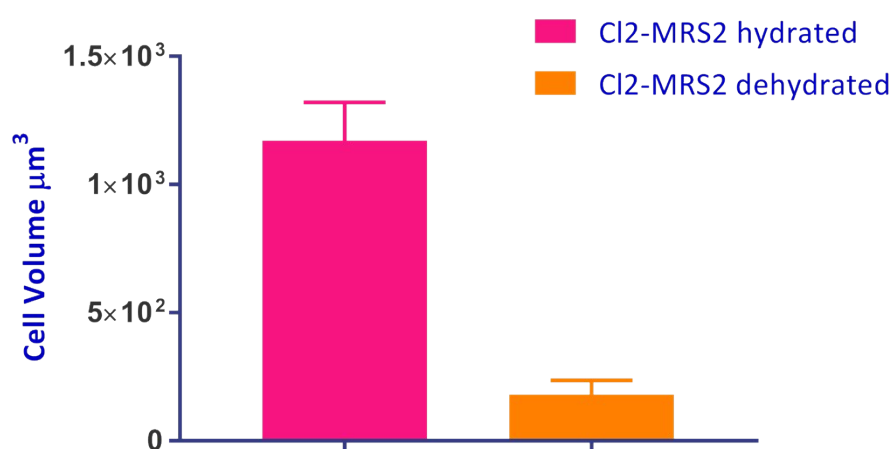

80  
81 **Fig. 14** ESI Mean cellular volume ( $\mu\text{m}^3$ ) of Clone2-MRS2 cells, hydrated (pink) and dehydrated (orange).  
82
